# Supplementary material for: A Double-Blind Randomized Controlled Trial of Augmentation and Switch Strategies for Refractory Social Anxiety Disorder
Source: Atypon-hosted journal article supplement (doi:10.1176/appi.ajp.2013.12101353), 2014-01-01
Supplement: 44_ds001.pdf [file 44_ds001.pdf]

Table S1. Non-Serious Adverse Events Occurring in  $\geq 5\%$  of Patients in  $\geq 1$  Treatment Arm (Supplemental Data, Online)

| Non-serious adverse event description | Sertraline/clonazepam (n=63) |    |     | Sertraline/placebo (n=59) |    |     | Venlafaxine (n=59) |    |     |
|---------------------------------------|------------------------------|----|-----|---------------------------|----|-----|--------------------|----|-----|
|                                       | Events                       | N  | %   | Events                    | N  | %   | Events             | N  | %   |
| Amnesia                               | 1                            | 1  | 2%  | 1                         | 1  | 2%  | 3                  | 3  | 5%  |
| Anorexia                              | 9                            | 8  | 13% | 9                         | 8  | 14% | 11                 | 11 | 19% |
| Anxiety                               | 3                            | 3  | 5%  | 3                         | 3  | 5%  | 1                  | 1  | 2%  |
| Appetite, increased                   | 2                            | 2  | 3%  | 4                         | 4  | 7%  | 1                  | 1  | 2%  |
| Asthenia                              | 14                           | 11 | 17% | 16                        | 15 | 25% | 10                 | 8  | 14% |
| Constipation                          | 1                            | 1  | 2%  | 5                         | 4  | 7%  | 8                  | 6  | 10% |
| Cough, increased                      | 2                            | 2  | 3%  | 3                         | 3  | 5%  | 0                  | 0  | 0   |
| Diarrhea                              | 8                            | 7  | 11% | 14                        | 11 | 19% | 5                  | 5  | 8%  |
| Dizziness                             | 6                            | 6  | 10% | 6                         | 6  | 10% | 7                  | 7  | 12% |
| Dreams, abnormal                      | 6                            | 6  | 10% | 11                        | 11 | 19% | 9                  | 9  | 15% |
| Dry Mouth                             | 8                            | 8  | 13% | 8                         | 8  | 14% | 12                 | 12 | 20% |
| Dyspepsia                             | 3                            | 3  | 5%  | 8                         | 5  | 8%  | 1                  | 1  | 2%  |
| Ejaculation, abnormal                 | 8                            | 7  | 11% | 3                         | 3  | 5%  | 6                  | 6  | 10% |
| Headache                              | 14                           | 12 | 19% | 28                        | 15 | 25% | 11                 | 8  | 14% |
| Infection                             | 5                            | 4  | 6%  | 3                         | 3  | 5%  | 5                  | 5  | 8%  |
| Insomnia                              | 10                           | 8  | 13% | 31                        | 25 | 42% | 27                 | 21 | 36% |
| Libido, decreased                     | 9                            | 9  | 14% | 15                        | 14 | 24% | 6                  | 6  | 10% |
| Nausea                                | 8                            | 8  | 13% | 11                        | 9  | 15% | 7                  | 7  | 12% |
| Nervousness                           | 5                            | 4  | 6%  | 14                        | 10 | 17% | 11                 | 9  | 15% |
| Pain                                  | 2                            | 2  | 3%  | 5                         | 5  | 8%  | 1                  | 1  | 2%  |
| Pharyngitis                           | 4                            | 4  | 6%  | 4                         | 3  | 5%  | 3                  | 3  | 5%  |
| Rash                                  | 1                            | 1  | 2%  | 3                         | 3  | 5%  | 2                  | 2  | 3%  |
| Sexual Function, abnormal             | 8                            | 8  | 13% | 14                        | 12 | 20% | 7                  | 6  | 10% |
| Somnolence                            | 26                           | 20 | 32% | 18                        | 14 | 24% | 11                 | 9  | 15% |
| Sweating                              | 1                            | 1  | 2%  | 10                        | 10 | 17% | 8                  | 8  | 14% |
| Thinking, abnormal                    | 3                            | 3  | 5%  | 4                         | 4  | 7%  | 2                  | 2  | 3%  |
| Tooth Disorder                        | 2                            | 2  | 3%  | 7                         | 6  | 10% | 5                  | 5  | 8%  |
| Tremor                                | 6                            | 6  | 10% | 2                         | 2  | 3%  | 6                  | 6  | 10% |
| Twitching                             | 1                            | 1  | 2%  | 4                         | 4  | 7%  | 2                  | 2  | 3%  |
| Urinary Frequency                     | 0                            | 0  | 0   | 4                         | 4  | 7%  | 1                  | 1  | 2%  |
